# Supplementary material for: The phenotype control kernel of a biomolecular regulatory network
Source: PubMed Central journal article supplement (PMC5887232; doi:10.1186/s12918-018-0576-8), 2018-04-05
Supplement: 12918_2018_576_MOESM1_ESM.pdf [file 12918_2018_576_MOESM1_ESM.pdf]

# **The phenotype control kernel of a biomolecular regulatory network**

**Sang-Mok Choo<sup>1</sup>, Byunghyun Ban<sup>2</sup>, Jae Il Joo<sup>2</sup>, and Kwang-Hyun Cho<sup>2,\*</sup>**

<sup>1</sup>Department of Mathematics, University of Ulsan, Ulsan 44610, Republic of Korea

<sup>2</sup>Department of Bio and Brain Engineering, Korea Advanced Institute of Science and  
Technology (KAIST), Daejeon 34141, Republic of Korea

## **Supporting information**

**Completion of construction of the converging tree in Fig. 2e  
and theorem for generating control set by minimal control set**

---

\*Corresponding author. E-mail: [ckh@kaist.ac.kr](mailto:ckh@kaist.ac.kr), Phone: +82-42-350-4325, Fax: +82-42-350-4310, Web: <http://sbie.kaist.ac.kr/>

### I. Completion of construction of the converging tree in Fig. 2e

In the main text (see Fig. 2) the converging tree has been constructed up to the 2<sup>nd</sup> level.

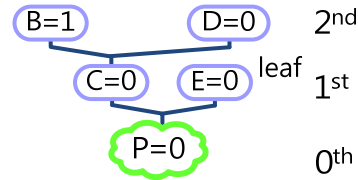

We explain the construction of the remaining levels.

Since there exist two parent sets  $\{B=1\}$  and  $\{D=0\}$  in the 2<sup>nd</sup> level, the children sets can be found for each parent set.

For the parent set  $\{B=1\}$  in the 2<sup>nd</sup> level, the candidates for control nodes are C and F because of the update rule  $B^*=C\&!F$ . Then the steady state value  $B=1$  is directly generated by substituting one of the perturbations  $\{(C, F)=(1,0)\}$  to the update rule. Applying the second removal rule, we find that  $\{(C, F)=(1,0)\}$  is removed because of the value  $C=1$  in the 3<sup>rd</sup> level, which is different from the value  $C=0$  of  $\{C=0\}$  in the 1<sup>st</sup> level. Then the parent set  $\{B=1\}$  in the 2<sup>nd</sup> level does not have a child set, which means that  $\{B=1\}$  is a leaf set in the 2<sup>nd</sup> level.

For the parent set  $\{D=0\}$  in the 2<sup>nd</sup> level, the candidates for control nodes are A and C because of the update rule  $D^*=A\&C$ . Then the steady state value  $D=0$  is directly generated by one of the perturbations  $\{A=0\}$  and  $\{C=0\}$ . Applying the first removal rule, we find that  $\{C=0\}$  in the 3<sup>rd</sup> level is removed due to  $\{C=0\}$  in the 1<sup>st</sup> level and that  $\{A=0\}$  is only the signal for the control set  $\{D=0\}$  in the 2<sup>nd</sup> level. Since the level of the minimal control set  $\{A=0\}$  is the 3<sup>rd</sup> level,  $\{A=0\}$  can indirectly control the phenotype value  $P=0$  in the 0<sup>th</sup> level via the parent  $\{D=0\}$  and the ancestor  $\{C=0\}$ . Therefore the minimal control set  $\{A=0\}$  generates the minimal control sets  $\{D=0\}$  and  $\{C=0\}$ .

Each control set in the 4<sup>th</sup> level consists of control nodes having their values that directly generate the signal  $\{A=0\}$  in the 3<sup>rd</sup> level by using the update equation for A

$$A^*=F.$$

The control node generating the steady state value  $A=0$  satisfies

$$0=F$$

and then  $\{F=0\}$  is the control set in the 4<sup>th</sup> level. Applying the two removal rules, we find that no control set is removed up to the present level. Hence  $\{F=0\}$  is the child set of the parent set  $\{A=0\}$  in below Figure S1 e.

From the update equation for F

$$F^*=D,$$

the control set generating  $F=0$  is

$$\{D=0\}.$$

Applying the first removal rule, we find that the child set  $\{D=0\}$  in the 5<sup>th</sup> level is removed because of the ancestor set  $\{D=0\}$  in the 2<sup>nd</sup> level, where the child set  $\{D=0\}$  in the 5<sup>th</sup> level is represented by a dotted circle in Figure S1 f. Therefore the parent set  $\{F=0\}$  in the 4<sup>th</sup> level becomes a leaf node. Since the level of the minimal control set  $\{F=0\}$  is the 4<sup>th</sup> level,  $\{F=0\}$  can indirectly control the phenotype value  $P=0$  in the 0<sup>th</sup> level via the parent  $\{A=0\}$  and the two ancestors  $\{D=0\}$  and  $\{C=0\}$ . Therefore the minimal control set  $\{F=0\}$  generates the minimal control sets  $\{A=0\}$ ,  $\{D=0\}$  and  $\{C=0\}$ .

Since all nodes in the 4<sup>th</sup> level are leaf nodes, the construction of the converging tree is completed in the 4<sup>th</sup> level (Figure S1 g).

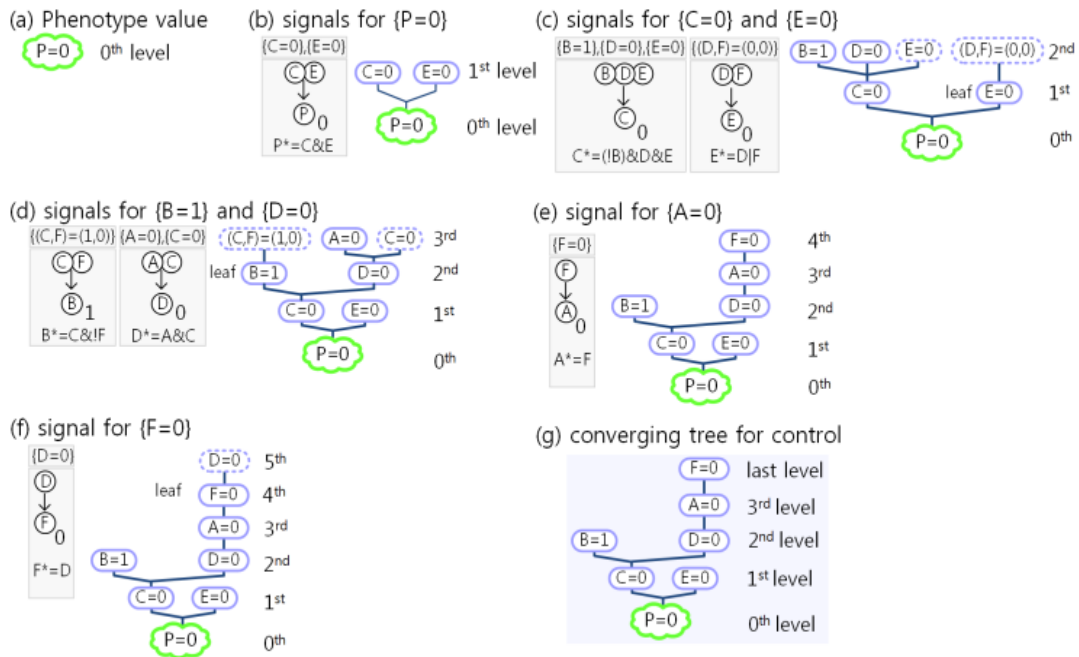

**Figure S1. Converging tree of the example network in Fig. 1a.** (a) The desired phenotype value  $P=0$  in the 0<sup>th</sup> level. (b) The signals for  $\{P=0\}$  in the 0<sup>th</sup> level are  $\{C=0\}$  and  $\{E=0\}$ , which are obtained by using the update rule  $P^*=C\&E$  for  $P$ . The left box denotes the two solutions of the equation  $0=C\&E$ , which are the 1<sup>st</sup>-level children sets of the 0<sup>th</sup>-level parent set  $\{P=0\}$  in the right tree. (c) The signals for  $\{C=0\}$  and signals for  $\{E=0\}$  in the 1<sup>st</sup> level. The signals for  $\{C=0\}$  are obtained from the update rule  $C^*=(!B)\&D\&E$ , which are  $\{B=1\}$ ,  $\{D=0\}$  and  $\{E=0\}$ , solutions of the equation  $0=(!B)\&D\&E$ . Similarly the signal for  $\{E=0\}$  is the unique solution  $\{(D, F)=(0,0)\}$  of the equation  $0=D|F$  coming from the update rule  $E^*=D|F$ . The four solutions are children sets in the 2<sup>nd</sup> level. Each control set with a dotted circle denotes a included control set, which is found by using the first removal rule. The term “leaf  $\{E=0\}$ ” means that  $\{E=0\}$  is a leaf set. The meanings of terms and symbols in (c)-(f) are same. (g) The final converging tree with six minimal control sets up to the last level.

## II. Theorem for generating control set by minimal control set

Consider a Boolean network with nodes  $N_{1,\xi}$  ( $1 \leq \xi \leq \theta$ ) for a positive integer  $\theta$ .

Let  $P_1, \dots, P_\ell$  be some of the phenotype nodes of the Boolean network, which are used to define the desired states  $P_i = d_i$  ( $1 \leq i \leq \ell$ ) of the network for a positive integer  $\ell$  and constants  $d_i \in \{0,1\}$ . We assume that every control set consists of some nodes in the layered node, where the  $0^{\text{th}}$  layer consists of the phenotype nodes and the desired values.

Theorem. Every control set contains a minimal control set as its subset.

Proof. We proceed by mathematical induction.

Let  $A_1 = \left\{ \widetilde{N}_{1,\nu} \mid \widetilde{N}_{1,\nu} = \widetilde{n}_{1,\nu}, 1 \leq \nu \leq a_1 \right\}$  for some nodes  $\widetilde{N}_{1,\nu}$  of the layered network,

some state values  $\widetilde{n}_{1,\nu}$  and a positive integer  $a_1$  ( $1 \leq a_1 \leq \theta$ ) and assume that

$$S_1(\vec{n}_1) = \left\{ N_\xi \mid N_\xi = n_\xi, 1 \leq \xi \leq \theta \right\} - A_1 \text{ contains no minimal control set, ---(a)}$$

where  $\vec{n}_1$  is a vector of state values of all nodes except nodes of  $A_1$ . Note that the state values of the vector  $\vec{n}_1$  are not fixed but the values of nodes in  $A_1$  is fixed. Assume that  $A_1$  is a control set which satisfies that substituting state values of any  $S_1(\vec{n}_1) \cup A_1$  at time step  $t=0$  into the Boolean update rules leads to  $P_i = d_i$  ( $1 \leq i \leq \ell$ ) at time step  $t=1$ . This implies that

$$S_1(\vec{n}_1) \cup A_1 \text{ contains a child set } B_1 \text{ of the parent set } \left\{ P_i \mid P_i = d_i, 1 \leq i \leq \ell \right\} \text{ ---(b)}$$

for any  $\vec{n}_1$ . Let  $\vec{m}_1$  be a vector of state values which are different from the values of nodes of minimal control sets in the 1<sup>st</sup> level. Letting  $\vec{n}_1 = \vec{m}_1$  and combining (a) and (b), we obtain the desired result

$$B_1 \subset A_1.$$

Assume that if  $A_k$  is any control set with the property that substituting state values of any  $S_k(\vec{n}_k) \cup A_k$  at time step  $t=0$  into the update Boolean rules leads to  $P_i = d_i (1 \leq i \leq \ell)$  at time step  $t=k$  for some positive integer  $k(k \geq 1)$ , then there exists at least one minimal control set  $B_k$  such that  $B_k \subset A_k$ , where  $S_k(\vec{n}_k) = \{N_\xi | N_\xi = n_\xi, 1 \leq \xi \leq \theta\} - A_k$  contains no minimal control set for a vector  $\vec{n}_k$  of state values of all nodes except nodes of  $A_k$ . We call the assumption ‘the kth assumption’.

Let  $A_{k+1}$  be a control set with the property that substituting state values of any  $S_{k+1}(\vec{n}_{k+1}) \cup A_{k+1}$  at time step  $t=0$  into the update Boolean rules leads to  $P_i = d_i (1 \leq i \leq \ell)$  at time step  $t=k+1$ , where  $S_{k+1}(\vec{n}_{k+1})$  is similarly defined as  $S_k(\vec{n}_k)$ . Let  $\vec{m}_{k+1}$  be a vector of state values which are different from the values of nodes of each minimal control set. Substituting  $S_{k+1}(\vec{m}_{k+1}) \cup A_{k+1}$  at time step  $t=0$  into the update Boolean rules, we obtain the set  $\Lambda_k \cup A_{k+1}$  of state values of all nodes at time step  $t=1$ . If  $\Lambda_k$  contains a minimal control set  $M$ , then  $A_{k+1}$  contains the minimal control set  $M$  since  $S_{k+1}(\vec{m}_{k+1})$  contains no minimal control set. Otherwise, applying ‘the kth assumption’ to  $\Lambda_k \cup A_{k+1}$ , we obtain that  $A_{k+1}$  contains a minimal control set. Finally the proof is completed due to the mathematical induction.

Remark. Let  $\tilde{N}_\nu$  be some nodes of the layered network of the Boolean network,  $\tilde{n}_\nu \in \{0,1\}$  and  $a (1 \leq a \leq \theta)$  be a positive integer. Assume that  $A = \{\tilde{N}_\nu | \tilde{N}_\nu = \tilde{n}_\nu, 1 \leq \nu \leq a\}$  contains at least one minimal control set and has no contradictory child set of parent or ancestor sets of

each minimal control set in  $A$ . Then  $A$  becomes a control set due to the definition of minimal control set.
